# Supplementary material for: Lightweight and flexible PAN@PPy/MXene films with outstanding electromagnetic interference shielding and Joule heating performance
Source: Royal Society of Chemistry journal article supplement (doi:10.1039/d2nr05318g), 2022-01-01
Supplement: d2nr05318g1.pdf [file d2nr05318g1.pdf]

Supporting information for:

Lightweight and Flexible PAN@PPy/MXene Films with Outstanding  
Electromagnetic Interference Shielding and Joule Heating Performance

Fushuo Wu<sup>1</sup>, Zhihua Tian<sup>1</sup>, Peiyong Hu<sup>1</sup>, Jingwen Tang<sup>1</sup>, Xueqin Xu<sup>1</sup>, Long Pan<sup>1</sup>,

Jian Liu,<sup>1,2</sup> Peigen Zhang<sup>1\*</sup>, ZhengMing Sun<sup>1\*</sup>

1. Jiangsu Key Laboratory of Advanced Metallic Materials, Southeast University, Nanjing 211189, P. R. China
2. Wuxi Lintex Advanced Materials Co., Ltd., Wuxi, P. R. China.

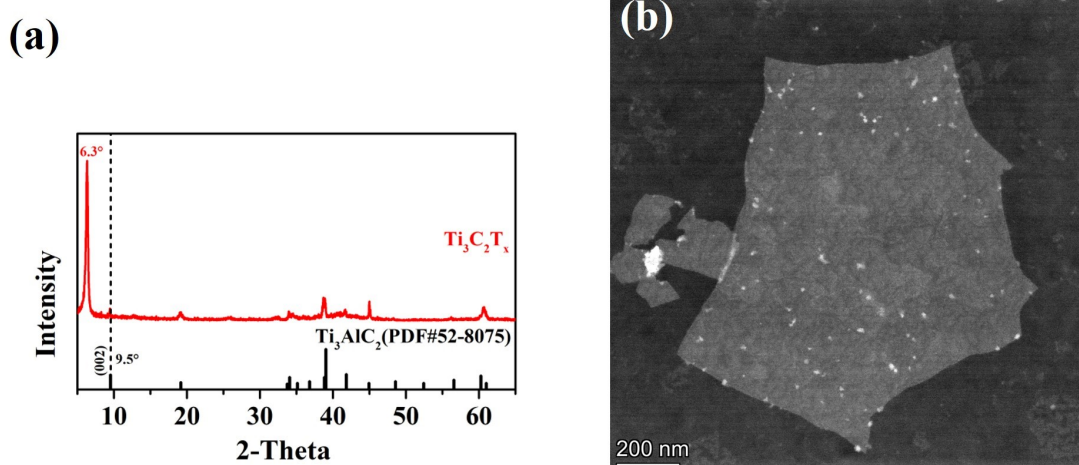

Fig. S1 (a) XRD patterns of  $\text{Ti}_3\text{AlC}_2$  and  $\text{Ti}_3\text{C}_2\text{T}_x$  MXene. (b) a TEM image of  $\text{Ti}_3\text{C}_2\text{T}_x$  nanosheets.

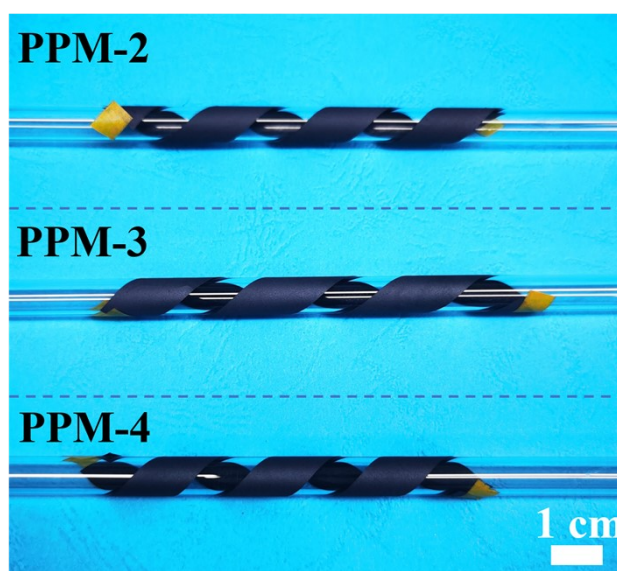

Fig. S2 Digital images of PAN@PPy/MXene films showing their flexibility.

\* Corresponding authors: zhpeigen@seu.edu.cn; zmsun@seu.edu.cn;

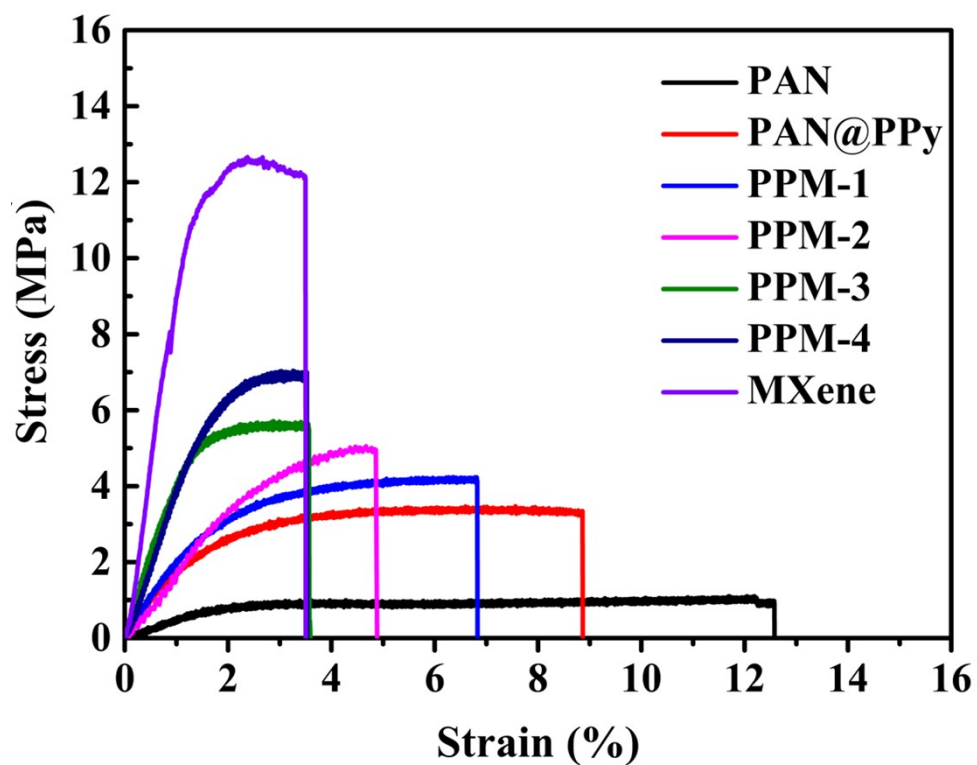

Fig. S3 Stress–strain curves of PAN, PAN@PPy, PAN@PPy/MXene and MXene films.

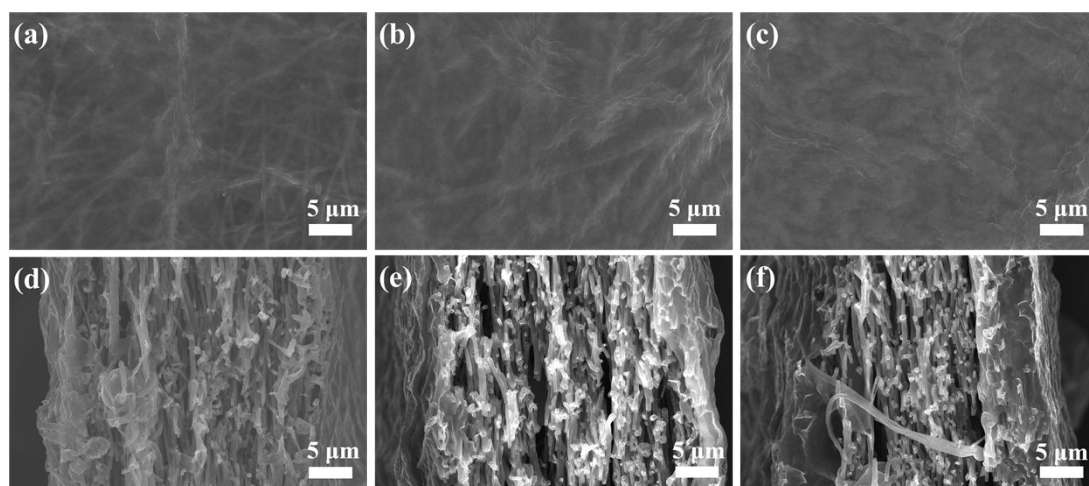

Fig. S4 Surface morphology of PAN@PPy/MXene films: (a) PPM-2 films; (b) PPM-3 films; (c) PPM-4 films. Cross-section morphology of PAN@PPy/MXene films: (d) PPM-2 films; (e) PPM-3 films; (f) PPM-4 films.
